# Supplementary material for: Enhancing optical properties through zinc halide precursor selection: interfacial optimization of InZnP quantum dots
Source: Royal Society of Chemistry journal article supplement (doi:10.1039/d3tc04023b), 2023-12-18
Supplement: d3tc04023b1.pdf [file d3tc04023b1.pdf]

## Electronic Supplementary Information

# Enhancing Optical Properties through Zinc Halide Precursor Selection: Interfacial Optimization of InZnP Quantum Dots

Chien-Chi Huang,<sup>a</sup> Shu-Ru Chung<sup>b\*</sup> and Kuan-Wen Wang<sup>a\*</sup>

<sup>1</sup> Institute of Materials Science and Engineering, National Central University, Taoyuan  
320, Taiwan

<sup>2</sup> Department of Materials Science and Engineering, National Formosa University,  
Yunlin 632, Taiwan

Corresponding Authors: Shu-Ru Chung ([srchung@nfu.edu.tw](mailto:srchung@nfu.edu.tw))

Kuan-Wen Wang ([kuanwen.wang@gmail.com](mailto:kuanwen.wang@gmail.com))

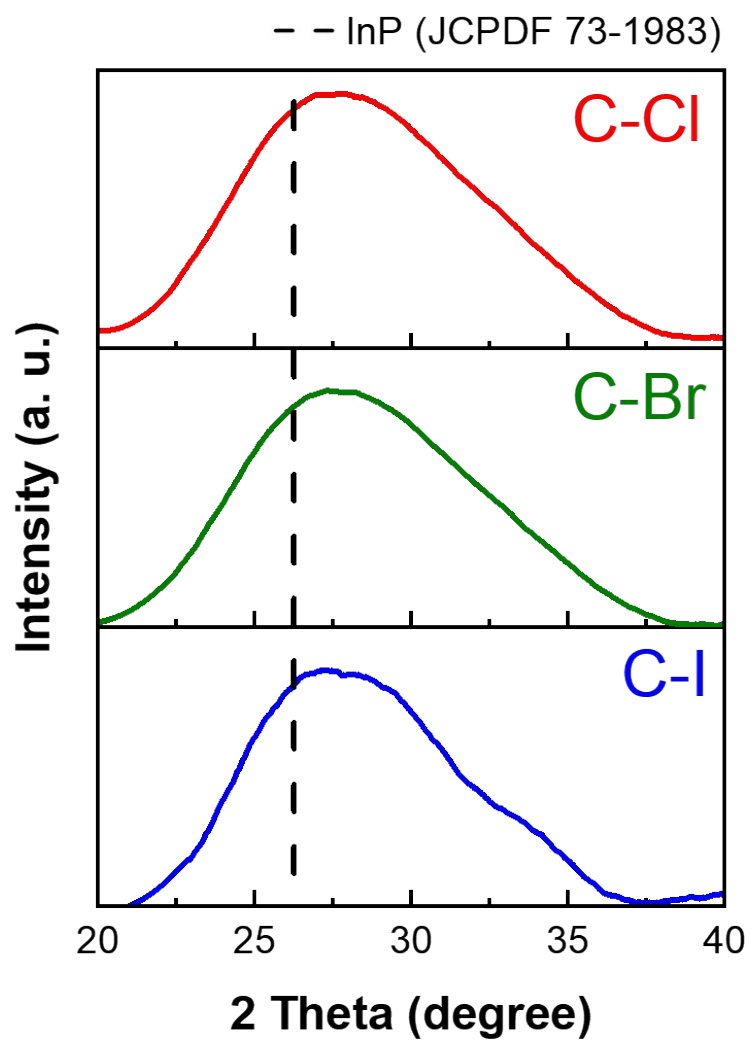

**Fig. S1** The XRD patterns of C-Cl, C-Br, and C-I QDs, magnified to show the range of 20-40 degrees.

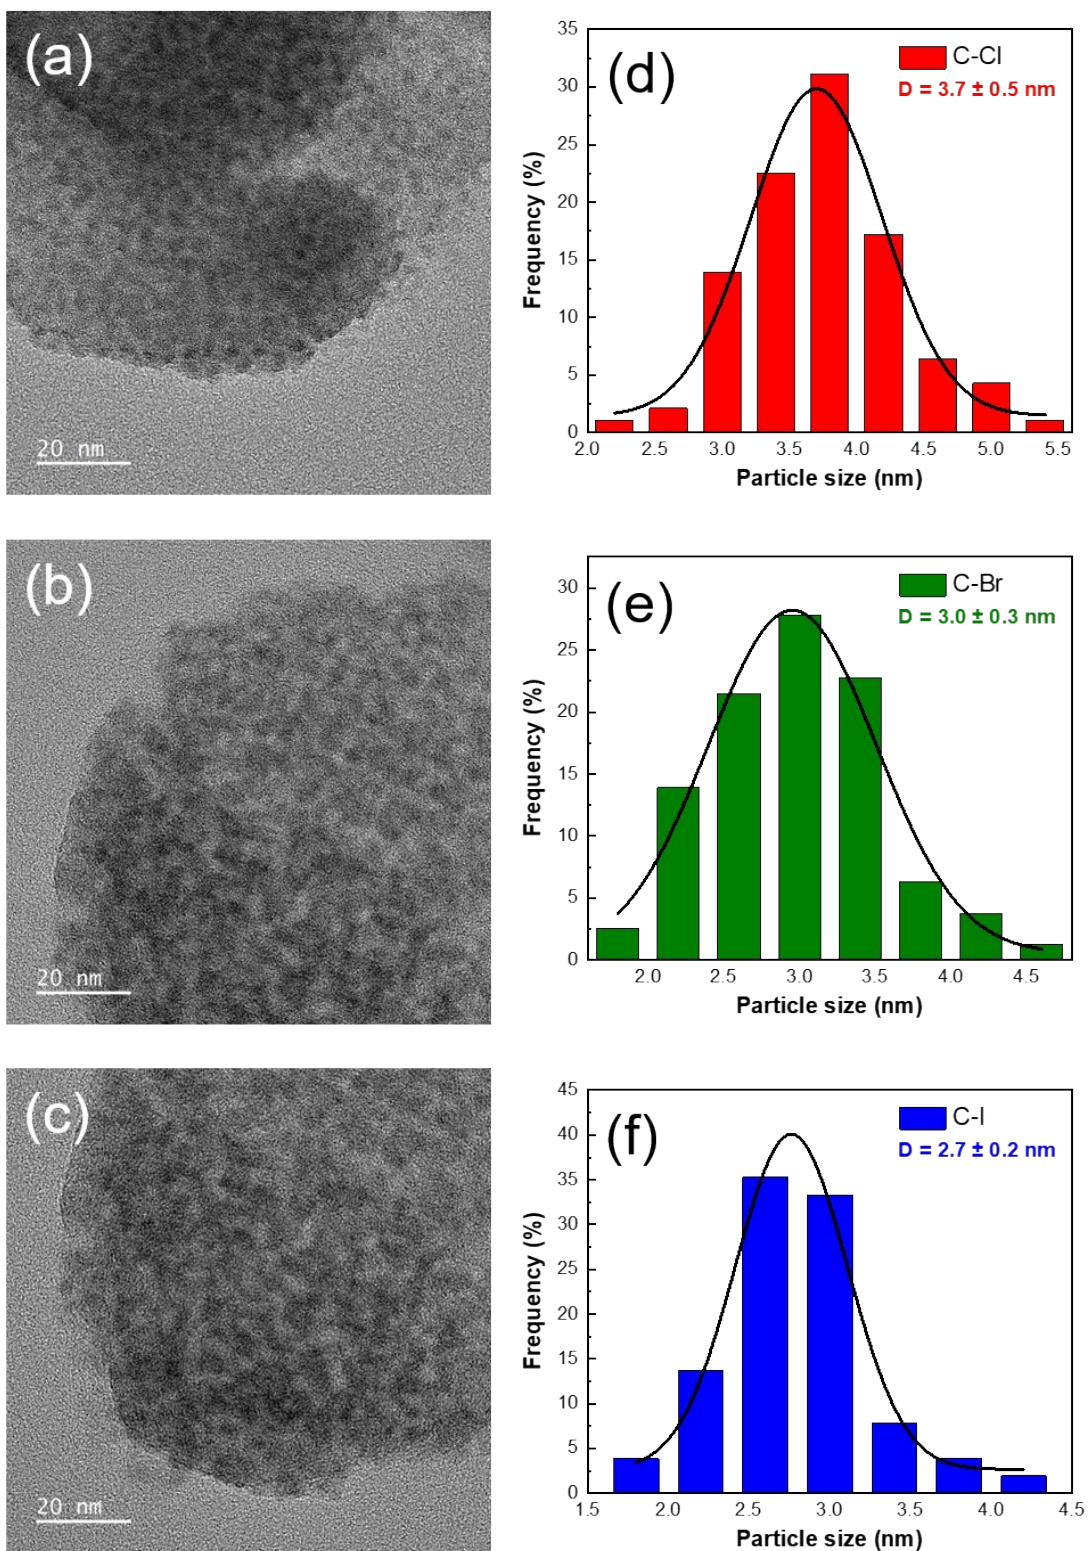

**Fig. S2** HRTEM images and the distribution of particle sizes of (a) C-Cl, (b) C-Br, and (c) C-I.

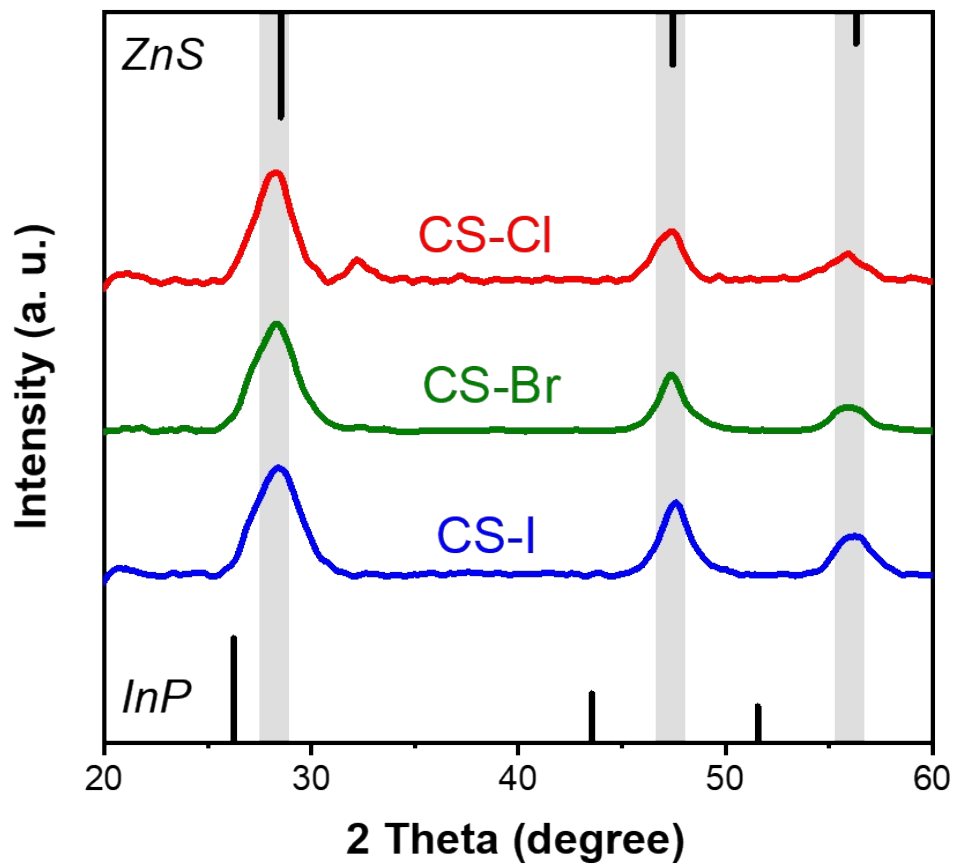

**Fig. S3** The XRD patterns of CS-Cl, CS-Br, and CS-I QDs.

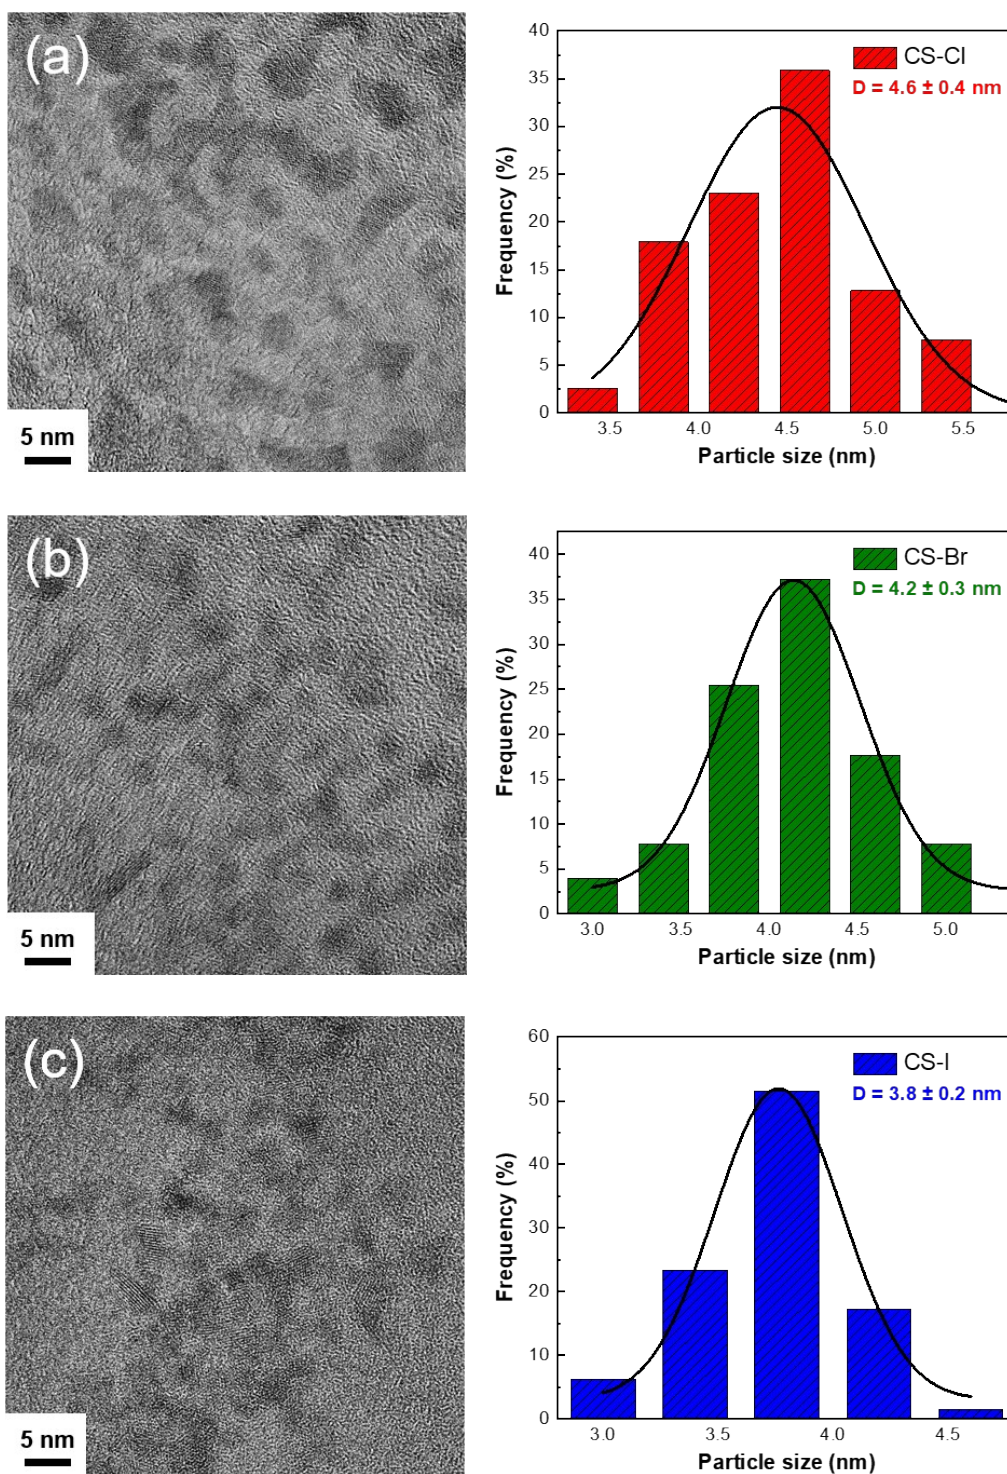

**Fig. S4** HRTEM images and the distribution of particle sizes of (a) CS-Cl, (b) CS-Br, and (c) CS-I.

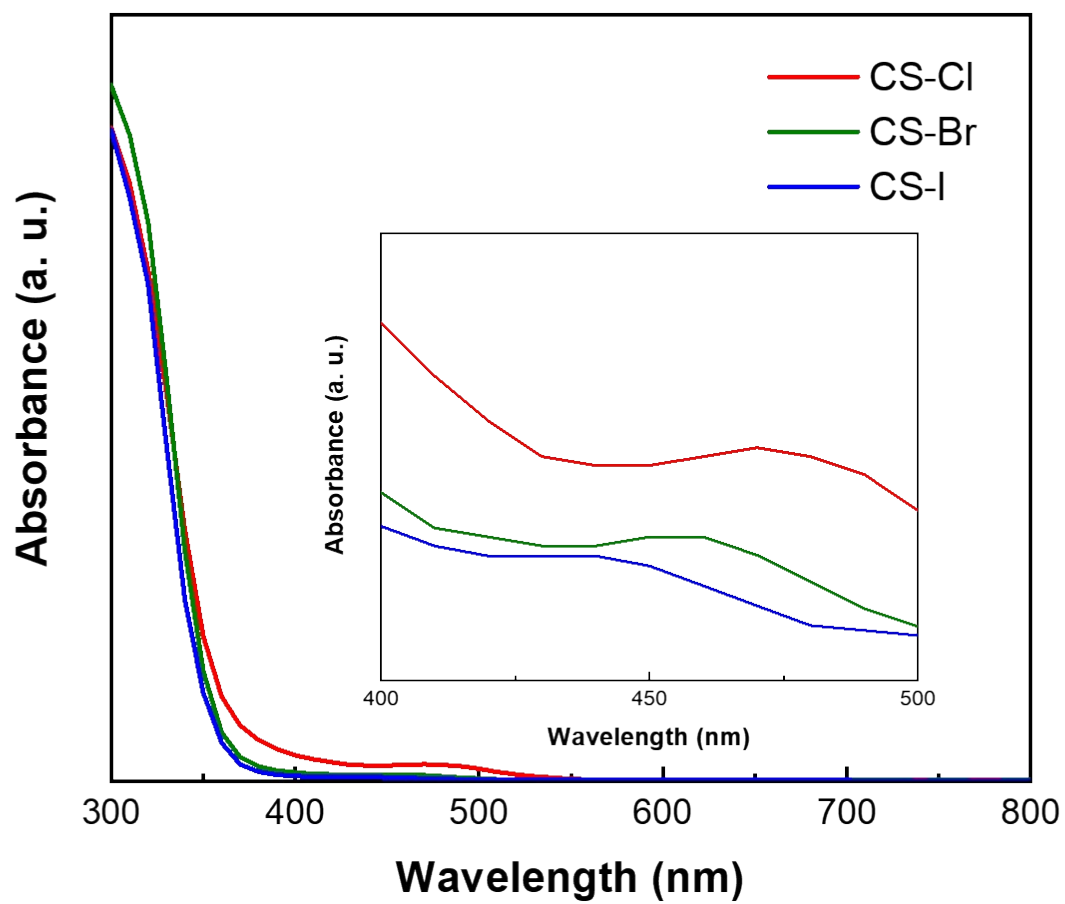

**Fig. S5** UV-vis absorption spectrum of CS-Cl, CS-Br, and CS-I QDs.

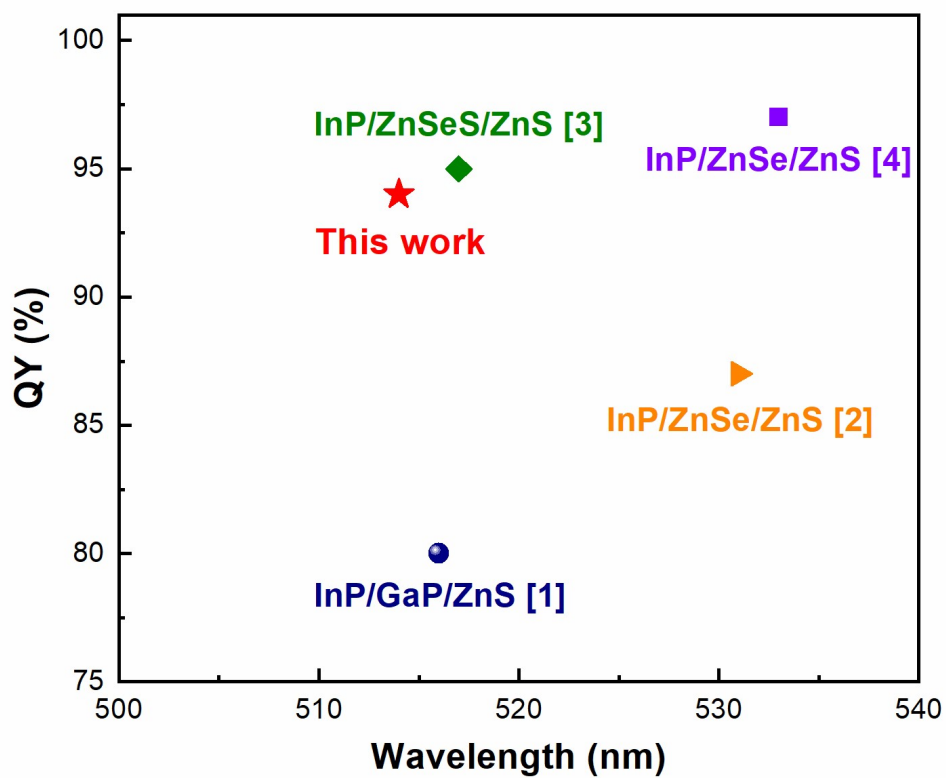

**Fig. S6** Comparison of QY of InZnP/ZnS in this study and other InP-based QDs from literature.

| <b>Sample</b> | <b>Wavelength<br/>(nm)</b> | <b>FWHM<br/>(nm)</b> | <b>QY<br/>(%)</b> |
|---------------|----------------------------|----------------------|-------------------|
| <b>CS-Cl</b>  | 514                        | 61                   | 94                |
| <b>CS-Br</b>  | 493                        | 39                   | 80                |
| <b>CS-I</b>   | 481                        | 28                   | 31                |

**Table S1** Physical properties of CS-X QDs.

**Table S2** Stability results of CS-X QDs.

| <b>Sample</b> | <b>As-prepared</b> | <b>2 months</b> | <b>4 months</b> |
|---------------|--------------------|-----------------|-----------------|
|               | <b>QY (%)</b>      |                 |                 |
| <b>CS</b>     | -                  | -               | -               |
| <b>CS-Cl</b>  | 94                 | 97              | 96              |
| <b>CS-Br</b>  | 80                 | 86              | 89              |
| <b>CS-I</b>   | 31                 | 35              | 37              |



## References

1. H. Zhang, N. Hu, Z. Zeng, Q. Lin, F. Zhang, A. Tang, Y. Jia, L. S. Li, H. Shen and F. Teng, *Adv. Opt. Mater.*, 2019, **7**, 1801602.
2. S. Y. Yoon, Y. J. Lee, H. Yang, D. Y. Jo, H. M. Kim, Y. Kim, S. M. Park, S. Park and H. Yang, *ACS Energy Lett.*, 2022, **7**, 2247-2255.
3. P. Liu, Y. Lou, S. Ding, W. Zhang, Z. Wu, H. Yang, B. Xu, K. Wang and X. W. Sun, *Adv. Funct. Mater.*, 2021, **31**, 2008453.
4. P. Yu, Y. Shan, S. Cao, Y. Hu, Q. Li, R. Zeng, B. Zou, Y. Wang and J. Zhao, *ACS Energy Lett.*, 2021, **6**, 2697-2703.
